# Supplementary material
Source: PubMed Central journal article supplement (PMC5672005)
Supplement: supp_RA117.000023_4553_2_supp_3867_xtm4xx.pdf [file supp_RA117.000023_4553_2_supp_3867_xtm4xx.pdf]

**Supplementary Figures for “High sensitivity quantitative proteomics using accumulated ion monitoring and automated multidimensional nano-flow chromatography”**

**CONTENT**

|                                                    |         |
|----------------------------------------------------|---------|
| Supplementary Figures Legends                      | page 2  |
| Supplementary Figure 1                             | page 4  |
| Supplementary Figure 2                             | page 5  |
| Supplementary Figure 3                             | page 6  |
| Supplementary Figure 4                             | page 7  |
| Supplementary Figure 5                             | page 8  |
| Supplementary Figure 6                             | page 9  |
| Supplementary Figure 7                             | page 10 |
| Supplementary materials provided as separate files | page 11 |

## SUPPLEMENTARY FIGURES LEGENDS

**Supplementary Figure 1.** A) Scanning electron micrograph of a typical nano-electrospray emitter tip, with 2  $\mu\text{m}$  tip diameter. B) Photomicrograph (4X) of a typical electrospray tip.

**Supplementary Figure 2.** Ionization efficiency estimation for four target peptides, obtained from optimized 2-3  $\mu\text{m}$  tip emitters.

**Supplementary Figure 3.** AIM acquisition enables detection of 2-5 yoctomoles/ms of target peptide serially diluted in neat solvent, and seven order of magnitude of linear dynamic range. The MS intensity within 10 ppm from the theoretical  $m/z$  was recorded for peptides SPEVSPPR (A), YTEYNEPHER (B), and LFEVIETEK (C) with maximum injection time (max IT) 25 (red), 250 (black), and 2500 (grey) ms ( $n=7$ , error bars = standard deviation). Noise levels recorded at baseline level (i.e., with no target peptide infused) is displayed for each maximum injection times as continuous line.

**Supplementary Figure 4.** Reverse phase retention times for 6 targets over 18 consecutive sample injections in A) 1D and B) 2D. Outliers runs were not removed to demonstrate true technical variability.

**Supplementary Figure 5.** Comparison of sensitivity in AIM and PRM sensitivity following 1D (black) and 2D (red) chromatography. The figures refers to peptides: SEPVSPR (A, B), SEPV(pS)PR (C,D), VLIPGSK (E, F), and YTEYNEPHER (G, H). Horizontal lines represent average noise levels ( $n=3$ ) for 1D (black) and 2D (red) in AIM. Error bars represent technical variability as standard deviation ( $n=3$ ) measured at noise

level, 10 amol and 100 fmol. Overlapping data points are horizontally offset when needed for clarity.

**Supplementary Figure 6.** Precision of measurement for AIM and PRM under 1D (shades of grey) and 2D (shades of red), expressed as variability (standard error of the mean) of endogenous peptides quantification.

**Supplementary Figure 7.** High target flow-rate, here demonstrated with peptide N(pS)PGLLVSPGNLNK at 1 pmol, produced deterioration of mass accuracy (black) and reverse phase resolution (evident as peak broadening to several minutes, red).

## SUPPLEMENTARY FIGURES

### Supplementary Figure 1.

A

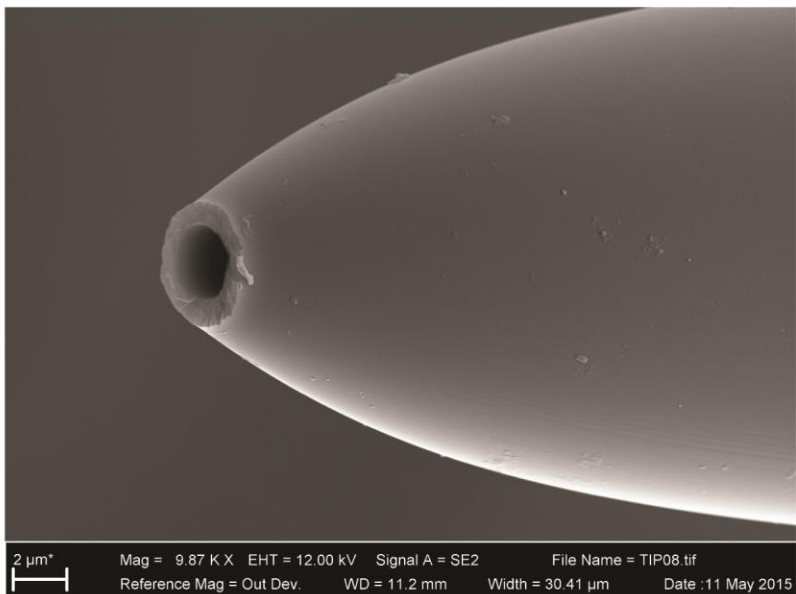

B

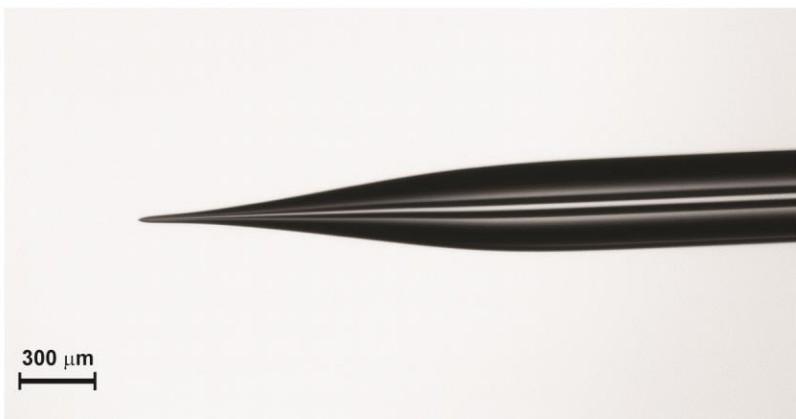

Supplementary Figure 2.

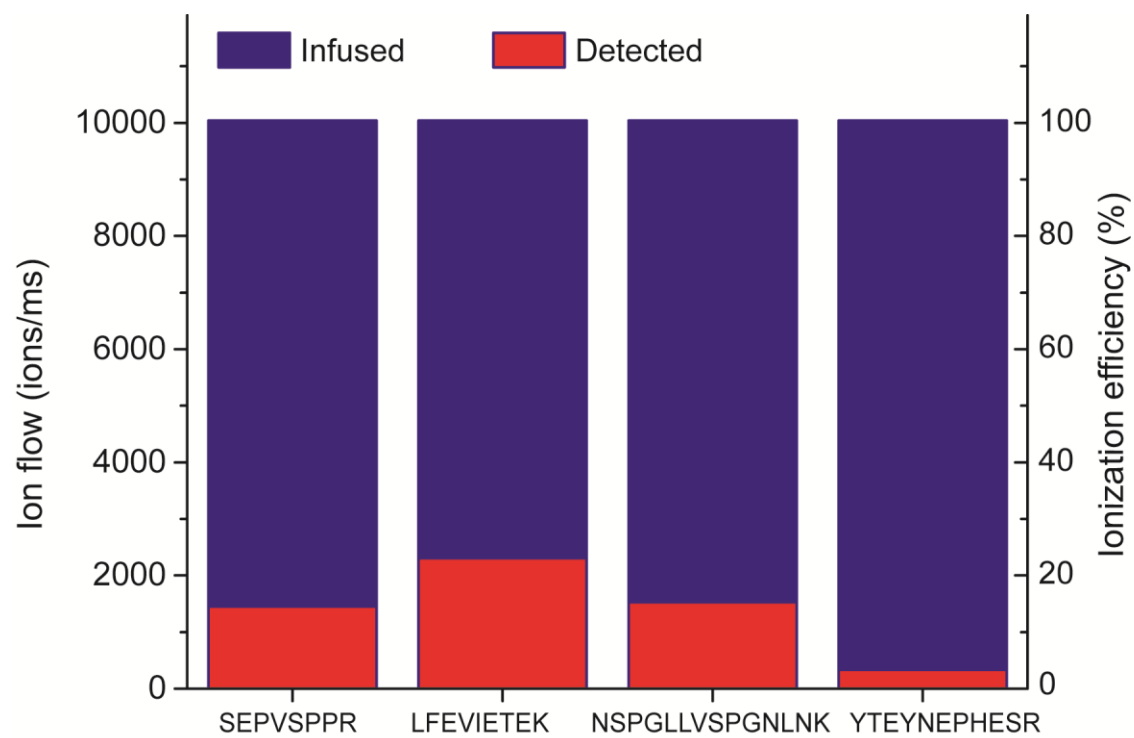

### Supplementary Figure 3.

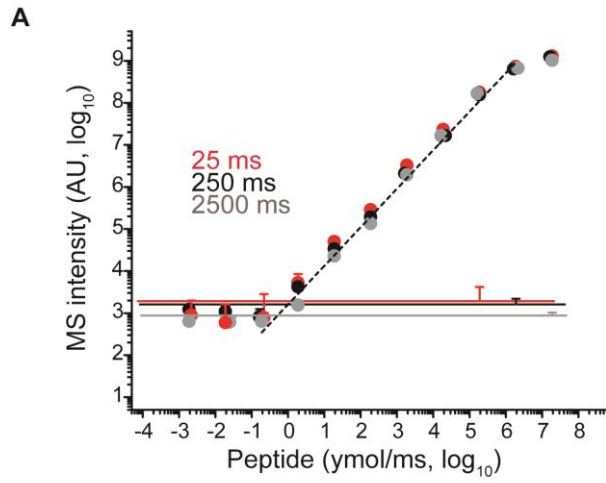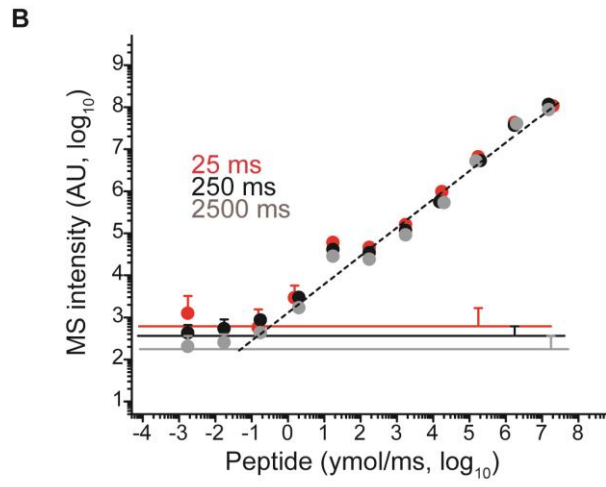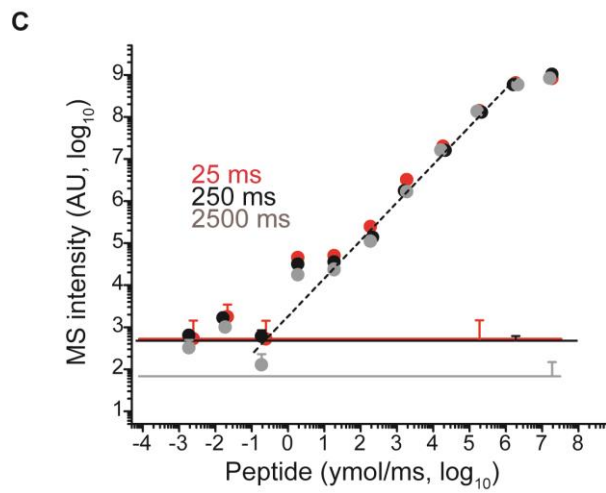

Supplementary Figure 4.

A

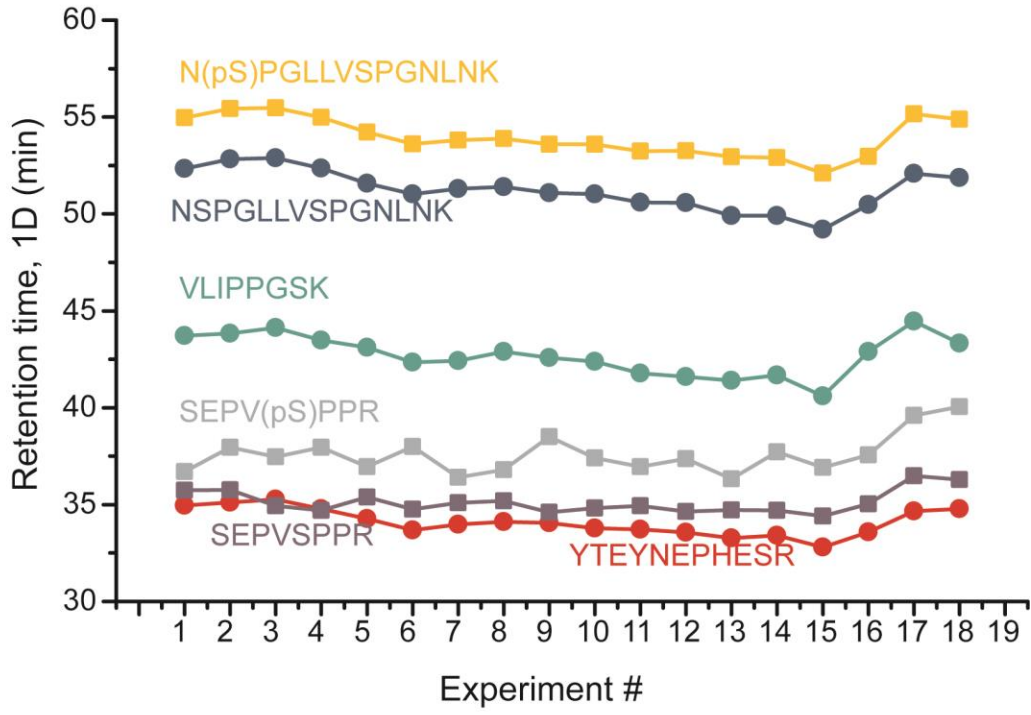

B

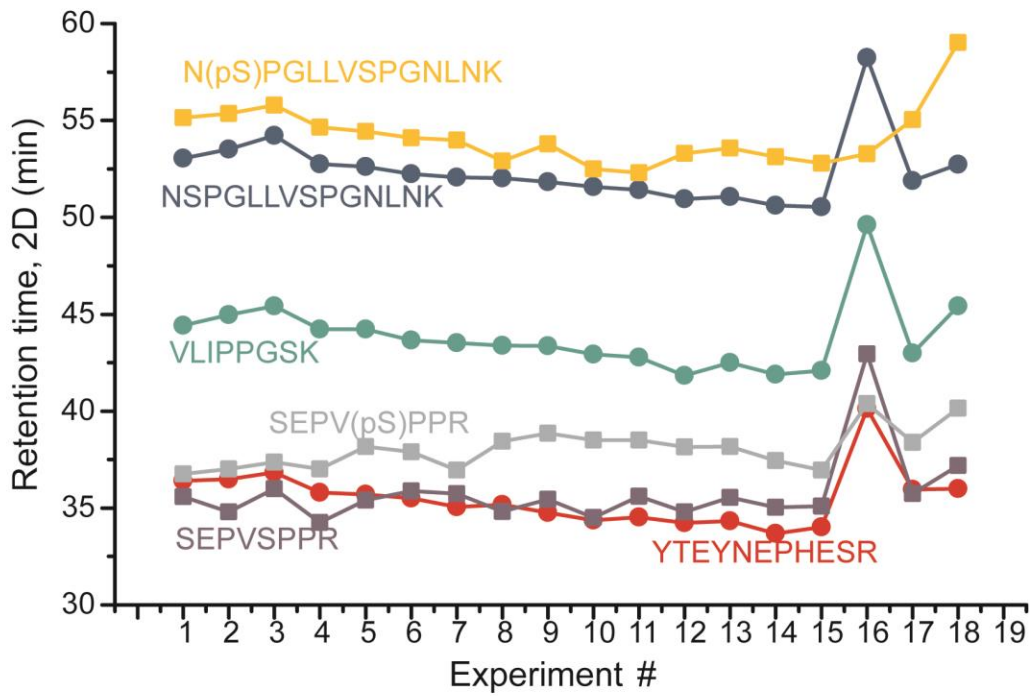

## Supplementary Figure 5.

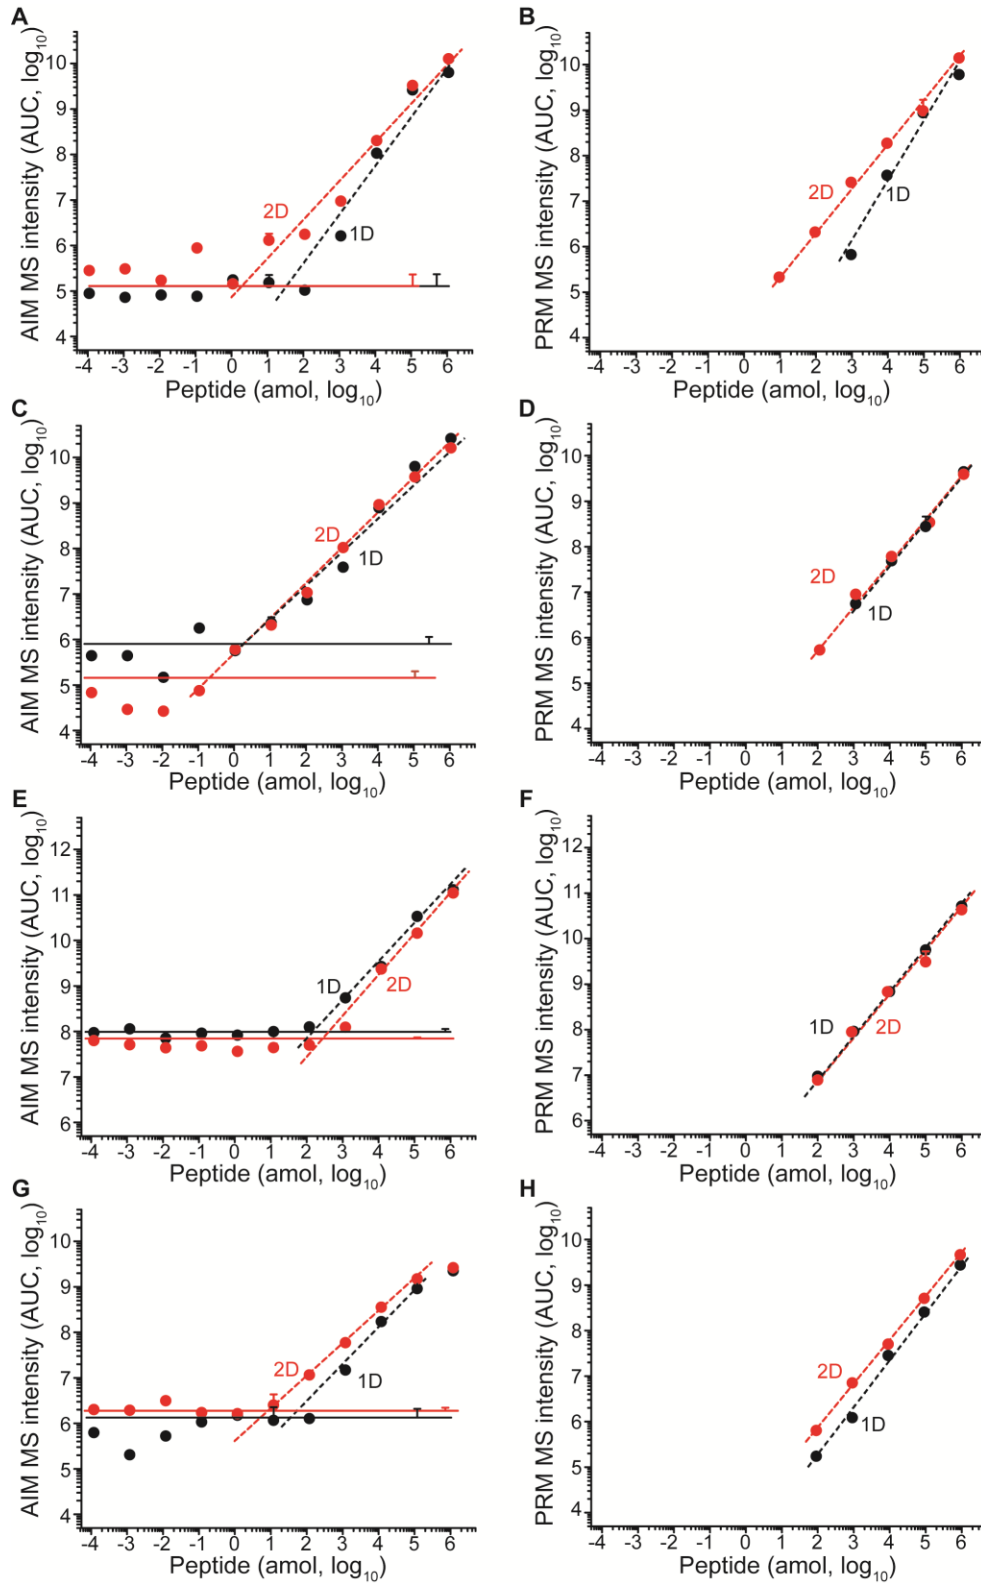



Supplementary Figure 6.

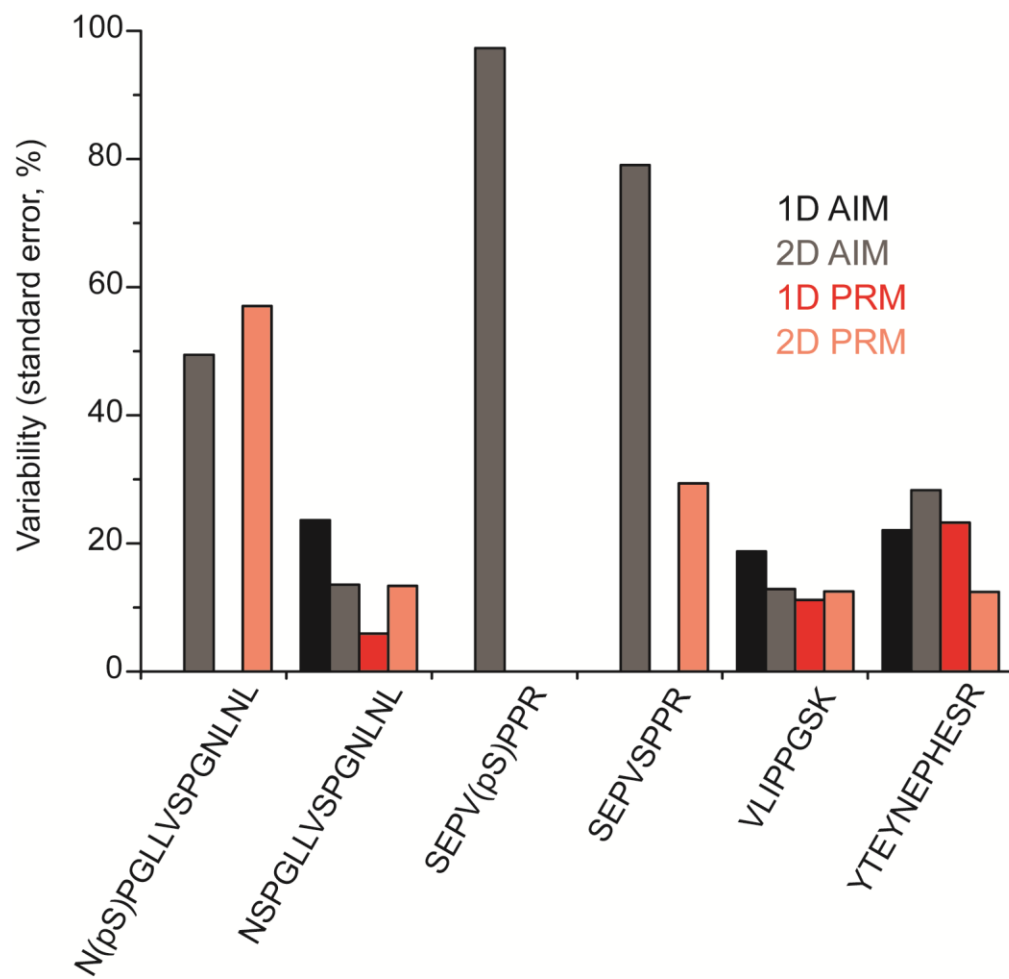

Supplementary Figure 7.

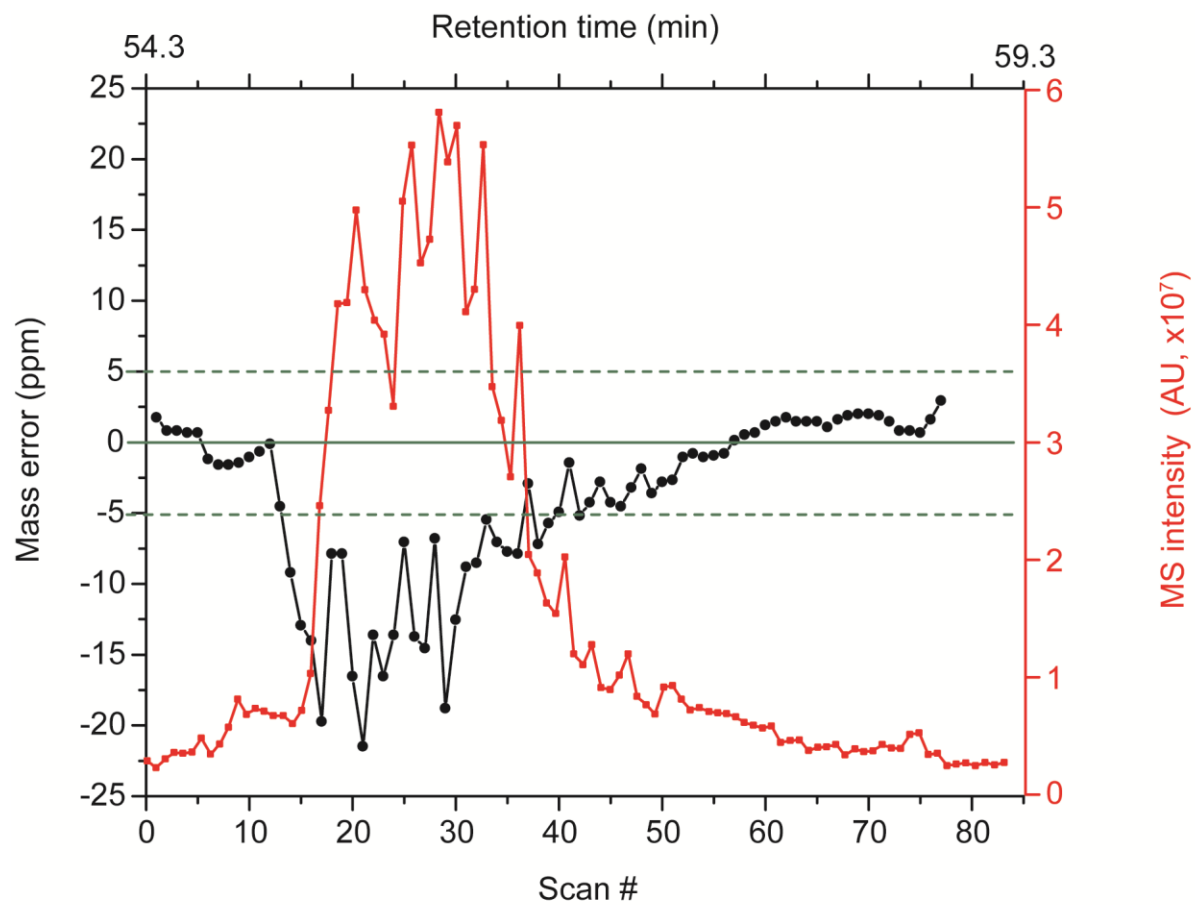

## **SUPPLEMENTARY MATERIALS**

**(provided as separate files)**

**Supplementary Table 1.** Optical absorbance determination of individual peptide concentration in stock solutions.

**Supplementary Table 2.** MS signal recorded for each target under direct infusion in neat solvent

**Supplementary Table 3.** AIM signal recorded for each target under 1D and 2D.

**Supplementary Table 4.** PRM signal recorded for each target under 1D and 2D.

**Supplementary Methods.** Detailed description and operational parameters of the automated 2D chromatography system.
